# Supplementary material
Source: PubMed Central journal article supplement (PMC7467636)
Supplement: es9b07773_si_001.pdf [file es9b07773_si_001.pdf]

# Supporting Information

1  
2 Unravelling metal speciation in the microenvironment surrounding  
3 phytoplankton cells to improve predictions of metal bioavailability

4 Fengjie Liu<sup>1\*</sup>, Qiao-Guo Tan<sup>2</sup>, Dominik Weiss<sup>1,3</sup>, Anne Crémazy<sup>4</sup>, Claude Fortin<sup>5</sup>, Peter  
5 G.C. Campbell<sup>5</sup>

6 <sup>1</sup>Department of Earth Science and Engineering, Imperial College London, South  
7 Kensington Campus, London, SW7 2AZ, United Kingdom

8 <sup>2</sup>Key Laboratory of the Coastal and Wetland Ecosystems, Ministry of Education,  
9 College of Environment and Ecology, Xiamen University, Xiamen, Fujian 361102,  
10 China

11 <sup>3</sup>Department of Civil and Environmental Engineering, Princeton University, NJ 08540,  
12 United States

13 <sup>4</sup>Department of Biological Sciences, University of New Brunswick, Saint John (NB),  
14 E2L 4L5, Canada

15 <sup>5</sup>Institut national de la Recherche scientifique, Centre Eau Terre Environnement, 490  
16 de la Couronne, Québec (Québec), G1K 9A9, Canada

17

18 \*Corresponding author: [fengjieliu2012@gmail.com](mailto:fengjieliu2012@gmail.com)

## Contents

|    |                                                                                                                                                                                                                                                          |    |
|----|----------------------------------------------------------------------------------------------------------------------------------------------------------------------------------------------------------------------------------------------------------|----|
| 20 | Table S1. A summary of the <i>in situ</i> measured pH and O <sub>2</sub> concentrations in the phycosphere of marine and freshwater phytoplankton cells. ....                                                                                            | 3  |
| 21 |                                                                                                                                                                                                                                                          |    |
| 22 | Table S2. Basic chemical composition of freshwater and seawater used for the calculation of metal speciation. ....                                                                                                                                       | 6  |
| 23 |                                                                                                                                                                                                                                                          |    |
| 24 | Table S3. Equilibrium modelled relative distribution of free ion, total inorganic complexes and total organic complexes of metals in the phycosphere of marine phytoplankton cells. ....                                                                 | 7  |
| 25 |                                                                                                                                                                                                                                                          |    |
| 26 |                                                                                                                                                                                                                                                          |    |
| 27 | Table S4. Equilibrium modelled relative distribution of free ion, total inorganic complexes and total organic complexes of metals in the phycosphere of freshwater phytoplankton cells. ....                                                             | 9  |
| 28 |                                                                                                                                                                                                                                                          |    |
| 29 |                                                                                                                                                                                                                                                          |    |
| 30 | Figure S1. Fold changes in the calculated oxidation rate of Fe(II), Mn(II) and Cu(I) in the phycosphere of freshwater or marine algae in the light or in the dark, in comparison to the calculated rates in bulk solutions. ....                         | 11 |
| 31 |                                                                                                                                                                                                                                                          |    |
| 32 |                                                                                                                                                                                                                                                          |    |
| 33 | Figure S2. The relationships between the calculated free Pb <sup>2+</sup> concentration in the bulk water or in the phycosphere and the measured Pb uptake rate by the freshwater alga <i>Chlamydomonas reinhardtii</i> CPCC11 under constant light .... | 12 |
| 34 |                                                                                                                                                                                                                                                          |    |
| 35 |                                                                                                                                                                                                                                                          |    |
| 36 | Figure S3. Bulk solution pH increase/decrease in the exposure solution, by nitrate NO <sub>3</sub> <sup>-</sup> or ammonium NH <sub>4</sub> <sup>+</sup> -fed algae. ....                                                                                | 13 |
| 37 |                                                                                                                                                                                                                                                          |    |
| 38 | Figure S4. The relationships between the measured Sm uptake rate by the freshwater alga <i>C. reinhardtii</i> CPCC11 and the calculated free Sm <sup>3+</sup> concentration in the bulk water and in the phycosphere. ....                               | 14 |
| 39 |                                                                                                                                                                                                                                                          |    |
| 40 |                                                                                                                                                                                                                                                          |    |
| 41 | Figure S5. A significant pH decrease of the exposure solution by ammonium NH <sub>4</sub> <sup>+</sup> -fed algae. ....                                                                                                                                  | 15 |
| 42 |                                                                                                                                                                                                                                                          |    |
| 43 | Note S1. Potential influences of several physical/chemical/biological factors, other than pH and O <sub>2</sub> , on metal behaviour in the phycosphere. ....                                                                                            | 16 |
| 44 |                                                                                                                                                                                                                                                          |    |
| 45 | Note S2. Calculation of the differences in oxidation rates of Fe(II), Cu(I) and Mn(II) between the phycosphere and bulk water. ....                                                                                                                      | 19 |
| 46 |                                                                                                                                                                                                                                                          |    |
| 47 | Table S5. Values used for the calculation of relative changes in metal oxidation rates in the phycosphere, in comparison to bulk waters. ....                                                                                                            | 20 |
| 48 |                                                                                                                                                                                                                                                          |    |
| 49 | Note S3. Estimation of the amount of Cu(I) oxidation and Cu complexation in the phycosphere. ....                                                                                                                                                        | 21 |
| 50 |                                                                                                                                                                                                                                                          |    |
| 51 | Table S6. Calculation of Cu residence time and percentage of total Cu(I) being oxidized by O <sub>2</sub> in the phycosphere. ....                                                                                                                       | 22 |
| 52 |                                                                                                                                                                                                                                                          |    |
| 53 | Note S4. Definition of Root Mean Square Logarithmic Error (RMSLE). ....                                                                                                                                                                                  | 24 |
| 54 | References. ....                                                                                                                                                                                                                                         | 25 |

55 **Table S1. A summary of the *in situ* measured pH and O<sub>2</sub> concentrations in the phycosphere of marine and freshwater**  
 56 **phytoplankton cells.**

| Species (Reference)                           | Habitat | Cell sample | Light<br>( $\mu\text{mol photons m}^{-2}$<br>$\text{s}^{-1}$ ) | pH          |      |            | O <sub>2</sub> (mM) |      |            |
|-----------------------------------------------|---------|-------------|----------------------------------------------------------------|-------------|------|------------|---------------------|------|------------|
|                                               |         |             |                                                                | Phycosphere | Bulk | difference | Phycosphere         | Bulk | difference |
| <i>Halimeda discoidea</i> <sup>1</sup>        | marine  | segment     | 0                                                              | 8.00        | 8.10 | -0.10      | 0.15                | 0.21 | -0.06      |
|                                               |         |             | 12                                                             | 8.10        | 8.10 | 0.00       | 0.21                | 0.21 | 0.00       |
|                                               |         |             | 36                                                             | 8.50        | 8.10 | 0.40       | 0.32                | 0.21 | 0.11       |
|                                               |         |             | 93                                                             | 9.00        | 8.10 | 0.90       | 0.50                | 0.21 | 0.29       |
|                                               |         |             | 200                                                            | 8.80        | 8.10 | 0.70       | 0.58                | 0.21 | 0.37       |
| <i>Odontella sinensis</i> <sup>2</sup>        | marine  | individual  | 0                                                              | 7.99        | 8.00 | -0.01      | 0.24                | 0.24 | 0.00       |
|                                               |         |             | 200                                                            | 8.35        | 8.00 | 0.35       | 0.32                | 0.24 | 0.08       |
| <i>Coscinodiscus</i> sp. <sup>2</sup>         | marine  | individual  | 200                                                            | 8.35        | 8.00 | 0.35       | --                  | --   | --         |
| <i>Odontella mobiliensis</i> <sup>2</sup>     | marine  | individual  | 200                                                            | 8.10        | 8.00 | 0.10       | --                  | --   | --         |
| <i>Thalassiosira weissflogii</i> <sup>2</sup> | marine  | individual  | 200                                                            | 8.05        | 8.00 | 0.05       | --                  | --   | --         |
| <i>Thalassiosira weissflogii</i> <sup>3</sup> | marine  | individual  | 160                                                            | 8.75        | 8.55 | 0.20       | --                  | --   | --         |
|                                               |         |             | 160                                                            | 9.05        | 8.55 | 0.50       | --                  | --   | --         |
|                                               |         |             | 160                                                            | 7.93        | 7.88 | 0.05       | --                  | --   | --         |
|                                               |         |             | 160                                                            | 7.90        | 7.88 | 0.02       | --                  | --   | --         |
| <i>Coscinodiscus wailesii</i> <sup>4</sup>    | marine  | individual  | 200                                                            | 8.40        | 8.10 | 0.30       | --                  | --   | --         |
| <i>Coscinodiscus wailesii</i> <sup>5</sup>    | marine  | individual  | 0                                                              | 7.70        | 7.70 | 0.00       | 0.19                | 0.22 | -0.03      |

| Species (Reference)                        | Habitat    | Cell sample    | Light<br>( $\mu\text{mol photons m}^{-2}$<br>$\text{s}^{-1}$ ) | pH          |      |            | O <sub>2</sub> (mM) |      |            |
|--------------------------------------------|------------|----------------|----------------------------------------------------------------|-------------|------|------------|---------------------|------|------------|
|                                            |            |                |                                                                | Phycosphere | Bulk | difference | Phycosphere         | Bulk | difference |
| <i>Coscinodiscus wailesii</i> <sup>5</sup> | marine     | individual     | 170                                                            | 8.60        | 7.70 | 0.90       | 0.38                | 0.22 | 0.16       |
| <i>Trichodesmium</i> <sup>6</sup>          | marine     | colony         | 1000                                                           | 8.40        | 8.10 | 0.30       | 0.32                | 0.21 | 0.11       |
|                                            |            |                | 0                                                              | 7.80        | 8.10 | -0.30      | 0.18                | 0.21 | -0.03      |
|                                            |            |                | 1000                                                           | 8.00        | 7.80 | 0.20       | 0.25                | 0.21 | 0.04       |
|                                            |            |                | 0                                                              | 7.60        | 7.80 | -0.20      | 0.16                | 0.21 | -0.05      |
| <i>Coscinodiscus granii</i> <sup>7</sup>   | marine     | individual     |                                                                | 8.32        | 8.03 | 0.29       | --                  | --   | --         |
|                                            |            |                |                                                                | 8.35        | 8.14 | 0.21       | --                  | --   | --         |
|                                            |            |                |                                                                | 8.48        | 8.22 | 0.26       | --                  | --   | --         |
| <i>Phaeocystis</i> <sup>8</sup>            | marine     | natural colony | 150                                                            | 8.90        | 8.50 | 0.40       | 0.54                | 0.30 | 0.24       |
|                                            |            |                | 0                                                              | 8.46        | 8.50 | -0.04      | 0.28                | 0.30 | -0.02      |
|                                            |            |                | 0                                                              | 8.16        | 8.19 | -0.03      | 0.28                | 0.30 | -0.02      |
|                                            |            |                | 20                                                             | 8.23        | 8.19 | 0.04       | 0.32                | 0.30 | 0.02       |
|                                            |            |                | 25                                                             | 8.28        | 8.19 | 0.09       | 0.33                | 0.30 | 0.03       |
|                                            |            |                | 50                                                             | 8.35        | 8.19 | 0.16       | 0.36                | 0.30 | 0.06       |
|                                            |            |                | 80                                                             | 8.45        | 8.19 | 0.26       | 0.40                | 0.30 | 0.10       |
|                                            |            |                | 130                                                            | 8.51        | 8.19 | 0.32       | 0.45                | 0.30 | 0.15       |
| <i>Ankistrodesmus</i> sp. <sup>9</sup>     | freshwater | aggregate      | 85                                                             | >8.00       | 6.80 | >1.20      | --                  | --   | --         |
| <i>Microcystis</i> sp. <sup>9</sup>        | freshwater | aggregate      | 85                                                             | >8.00       | 6.80 | >1.20      | --                  | --   | --         |
| <i>Chlorella</i> sp. <sup>9</sup>          | freshwater | aggregate      | 85                                                             | >8.00       | 6.80 | >1.20      | --                  | --   | --         |
| <i>Nitzschia</i> sp. <sup>9</sup>          | freshwater | aggregate      | 85                                                             | >8.00       | 6.80 | >1.20      | --                  | --   | --         |
| <i>Anabaena</i> sp. <sup>9</sup>           | freshwater | individual     | 85                                                             | >8.00       | 6.80 | >1.20      | --                  | --   | --         |
| <i>Scenedesmus</i> sp. <sup>9</sup>        | freshwater | individual     | 85                                                             | >8.00       | 6.80 | >1.20      | --                  | --   | --         |

| Species (Reference)                  | Habitat    | Cell sample           | Light<br>( $\mu\text{mol photons m}^{-2}$<br>$\text{s}^{-1}$ ) | pH          |      |            | O <sub>2</sub> (mM) |      |            |
|--------------------------------------|------------|-----------------------|----------------------------------------------------------------|-------------|------|------------|---------------------|------|------------|
|                                      |            |                       |                                                                | Phycosphere | Bulk | difference | Phycosphere         | Bulk | difference |
| Unicellular green <sup>9</sup>       | freshwater | individual            | 85                                                             | >8.00       | 6.80 | >1.20      | --                  | --   | --         |
| <i>Vaucheria</i> sp. <sup>9</sup>    | freshwater | individual            | 85                                                             | >8.00       | 6.80 | >1.20      | --                  | --   | --         |
| <i>Chlorella</i> sp. <sup>10</sup>   | freshwater | cell layer<br>natural | 108                                                            | 10.30       | 7.50 | 2.80       | 0.36                | 0.14 | 0.22       |
| <i>Microcystis</i> sp. <sup>10</sup> | freshwater | aggregate<br>natural  | sunlight                                                       | 10.40       | 9.00 | 1.40       | 1.10                | 0.37 | 0.73       |
| <i>Microcystis</i> sp. <sup>10</sup> | freshwater | aggregate             | sunlight                                                       | 9.25        | 9.00 | 0.25       | 0.40                | 0.20 | 0.20       |

57

58 Note, the  $\Delta$  pH values in the Figure 1 were calculated as the differences between the bulk waters and the phycosphere, and we

59 didn't convert the numbers into  $\Delta$  [H<sup>+</sup>].

60 **Table S2. Basic chemical composition of freshwater and seawater used for the**  
 61 **calculation of metal speciation.**

| Component       | Freshwater<br>(mol L <sup>-1</sup> ) | Seawater<br>(mol L <sup>-1</sup> ) |
|-----------------|--------------------------------------|------------------------------------|
| Na              | $5.0 \times 10^{-4}$                 | $4.8 \times 10^{-1}$               |
| Mg              | $5.0 \times 10^{-4}$                 | $5.5 \times 10^{-2}$               |
| K               | $5.0 \times 10^{-5}$                 | $1.0 \times 10^{-2}$               |
| Ca              | $5.0 \times 10^{-4}$                 | $1.0 \times 10^{-2}$               |
| Cl              | $1.0 \times 10^{-3}$                 | $5.6 \times 10^{-1}$               |
| SO <sub>4</sub> | $5.0 \times 10^{-4}$                 | $2.9 \times 10^{-2}$               |
| CO <sub>3</sub> | open to air                          | $2.4 \times 10^{-3}$               |
| NO <sub>3</sub> | $5.0 \times 10^{-4}$                 | --                                 |
| Br              | --                                   | $8.4 \times 10^{-4}$               |
| BO <sub>3</sub> | --                                   | $4.9 \times 10^{-5}$               |
| F               | --                                   | $7.2 \times 10^{-5}$               |
| Sr              | --                                   | $6.4 \times 10^{-5}$               |
| Al              | $1.0 \times 10^{-5}$                 | $1.0 \times 10^{-7}$               |
| Cd              | $1.0 \times 10^{-9}$                 | $1.0 \times 10^{-10}$              |
| Co(II)          | $1.0 \times 10^{-9}$                 | $1.0 \times 10^{-9}$               |
| Cu(II)          | $2.0 \times 10^{-8}$                 | $5.0 \times 10^{-8}$               |
| Cu(I)           | --                                   | $2.5 \times 10^{-9}$               |
| Fe(III)         | $1.0 \times 10^{-6}$                 | $1.0 \times 10^{-8}$               |
| Fe(II)          | --                                   | $2.4 \times 10^{-9}$               |
| Sm*             | $5.0 \times 10^{-11}$                | $1.0 \times 10^{-11}$              |
| Hg              | --                                   | $1.0 \times 10^{-12}$              |
| Mn(II)          | --                                   | $1.0 \times 10^{-7}$               |
| Ni              | $5.0 \times 10^{-9}$                 | $1.0 \times 10^{-8}$               |
| Pb              | $1.0 \times 10^{-8}$                 | $1.0 \times 10^{-10}$              |
| Zn              | $1.0 \times 10^{-7}$                 | $1.0 \times 10^{-8}$               |
| DOC (mg/L)      | 0.3-32                               | 0.14-16                            |

62 The concentrations of major cations/anions, trace metals, and DOC were taken from  
 63 several publications.<sup>11-14</sup> \*The dissolved Sm concentrations refer to two studies.<sup>15, 16</sup>

**Table S3. Equilibrium modelled relative distribution (%) of free ion, total inorganic complexes (-Inorg.) and total organic complexes (-Org.) of metals in the phycosphere of marine phytoplankton cells.**

| Metal species        | Bulk seawater                                  |                                  |                                 | Bulk seawater                                |                                  |                                 |
|----------------------|------------------------------------------------|----------------------------------|---------------------------------|----------------------------------------------|----------------------------------|---------------------------------|
|                      | pH 8.0                                         | Phycosphere<br>pH 8.3<br>(light) | Phycosphere<br>pH 7.9<br>(dark) | pH 8.0                                       | Phycosphere<br>pH 8.3<br>(light) | Phycosphere<br>pH 7.9<br>(dark) |
| %                    | in the presence of 0.14 mg L <sup>-1</sup> DOC |                                  |                                 | in the presence of 16 mg L <sup>-1</sup> DOC |                                  |                                 |
| Al <sup>3+</sup>     | <0.01                                          | <0.01                            | <0.01                           | <0.01                                        | <0.01                            | <0.01                           |
| Al-Inorg.            | 99.99                                          | 99.99                            | 99.99                           | 84.68                                        | 96.60                            | 77.43                           |
| Al-Org.              | <0.01                                          | <0.01                            | <0.01                           | 15.32                                        | 3.40                             | 22.57                           |
| Cd <sup>2+</sup>     | 3.49                                           | 3.48                             | 3.49                            | 2.96                                         | 2.66                             | 3.05                            |
| Cd-Inorg.            | 96.50                                          | 96.50                            | 96.50                           | 81.90                                        | 73.58                            | 84.34                           |
| Cd-Org.              | <0.01                                          | <0.01                            | <0.01                           | 15.12                                        | 23.76                            | 12.61                           |
| Co <sup>2+</sup>     | 74.51                                          | 72.45                            | 74.93                           | 59.05                                        | 50.37                            | 61.66                           |
| Co-Inorg.            | 25.48                                          | 27.54                            | 25.06                           | 20.20                                        | 19.15                            | 20.63                           |
| Co-Org.              | <0.01                                          | <0.01                            | <0.01                           | 20.75                                        | 30.48                            | 17.71                           |
| Cu(I) <sup>+</sup>   | <0.01                                          | <0.01                            | <0.01                           | <0.01                                        | <0.01                            | <0.01                           |
| Cu(I)-Inorg.         | 99.99                                          | 99.99                            | 99.99                           | 99.99                                        | 99.99                            | 99.99                           |
| Cu(I)-Org.           | <0.01                                          | <0.01                            | <0.01                           | <0.01                                        | <0.01                            | <0.01                           |
| Cu <sup>2+</sup>     | 4.45                                           | 1.93                             | 5.66                            | <0.01                                        | <0.01                            | <0.01                           |
| Cu-Inorg.            | 54.30                                          | 48.91                            | 55.26                           | <0.01                                        | <0.01                            | <0.01                           |
| Cu-Org.              | 41.25                                          | 49.14                            | 39.07                           | 99.99                                        | 99.99                            | 99.99                           |
| Fe(II) <sup>2+</sup> | 73.80                                          | 72.89                            | 73.98                           | 73.57                                        | 72.67                            | 73.75                           |
| Fe(II)-Inorg.        | 26.20                                          | 27.10                            | 26.02                           | 26.12                                        | 27.03                            | 25.94                           |
| Fe(II)-Org.          | <0.01                                          | <0.01                            | <0.01                           | 0.31                                         | 0.30                             | 0.31                            |
| Fe <sup>3+</sup>     | <0.01                                          | <0.01                            | <0.01                           | <0.01                                        | <0.01                            | <0.01                           |
| Fe-Inorg.            | 24.85                                          | 38.43                            | 22.19                           | <0.01                                        | <0.01                            | <0.01                           |
| Fe-Org.              | 75.15                                          | 61.56                            | 77.81                           | 99.99                                        | 99.99                            | 99.99                           |
| Hg <sup>2+</sup>     | <0.01                                          | <0.01                            | <0.01                           | <0.01                                        | <0.01                            | <0.01                           |
| Hg-Inorg.            | 96.49                                          | 94.79                            | 96.87                           | <0.01                                        | <0.01                            | <0.01                           |
| Hg-Org.              | 3.51                                           | 5.21                             | 3.13                            | 99.99                                        | 99.99                            | 99.99                           |
| Mn <sup>2+</sup>     | 67.44                                          | 63.97                            | 68.19                           | 67.36                                        | 63.90                            | 68.11                           |
| Mn-Inorg.            | 32.56                                          | 36.03                            | 31.81                           | 32.53                                        | 36.00                            | 31.78                           |
| Mn-Org.              | <0.01                                          | <0.01                            | <0.01                           | 0.11                                         | 0.10                             | 0.11                            |
| Ni <sup>2+</sup>     | 72.26                                          | 69.16                            | 72.92                           | 67.97                                        | 65.29                            | 68.54                           |
| Ni-Inorg.            | 27.69                                          | 30.79                            | 27.03                           | 26.05                                        | 29.07                            | 25.41                           |
| Ni-Org.              | 0.05                                           | 0.04                             | 0.05                            | 5.97                                         | 5.63                             | 6.04                            |

| Metal species    | Bulk seawater | Phycosphere                                    |               | Bulk seawater | Phycosphere                                  |               |
|------------------|---------------|------------------------------------------------|---------------|---------------|----------------------------------------------|---------------|
|                  |               | pH 8.3 (light)                                 | pH 7.9 (dark) |               | pH 8.3 (light)                               | pH 7.9 (dark) |
| %                | pH 8.0        | in the presence of 0.14 mg L <sup>-1</sup> DOC |               | pH 8.0        | in the presence of 16 mg L <sup>-1</sup> DOC |               |
| Pb <sup>2+</sup> | 5.29          | 3.73                                           | 5.74          | 0.12          | 0.07                                         | 0.14          |
| Pb-Inorg.        | 91.92         | 92.87                                          | 91.71         | 2.03          | 1.65                                         | 2.29          |
| Pb-Org.          | 2.78          | 3.39                                           | 2.54          | 97.84         | 98.27                                        | 97.55         |
| Sm <sup>3+</sup> | 1.41          | 0.69                                           | 1.73          | <0.01         | <0.01                                        | <0.01         |
| Sm-Inorg.        | 42.18         | 54.97                                          | 38.85         | <0.01         | <0.01                                        | <0.01         |
| Sm-Org.          | 56.41         | 44.34                                          | 59.42         | 99.99         | 99.99                                        | 99.99         |
| Zn <sup>2+</sup> | 49.35         | 44.04                                          | 50.31         | 8.19          | 4.97                                         | 9.78          |
| Zn-Inorg.        | 50.59         | 55.85                                          | 49.63         | 8.39          | 6.31                                         | 9.64          |
| Zn-Org.          | 0.07          | 0.08                                           | 0.06          | 83.41         | 88.72                                        | 80.57         |

65 Note, data are also shown for bulk seawater at pH 8.0. Here, the average phycosphere  
66 pH change (i.e., a 0.3-unit increase in the light, and a 0.1-unit decrease in the dark) was  
67 used to calculate the speciation change in the presence of low and high concentrations  
68 of dissolved organic carbon (DOC).



69 **Table S4. Equilibrium modelled relative distribution (%) of free ion, total inorganic**  
70 **complexes (-Inorg.) and total organic complexes (-Org.) of metals in the phycosphere**  
71 **of freshwater phytoplankton cells.**

| Metal species    | Bulk freshwater Phycosphere                   |                |               | Bulk freshwater Phycosphere                  |                |               |
|------------------|-----------------------------------------------|----------------|---------------|----------------------------------------------|----------------|---------------|
|                  | pH 7.0                                        | pH 8.3 (light) | pH 6.5 (dark) | pH 7.0                                       | pH 8.3 (light) | pH 6.5 (dark) |
| %                | in the presence of 0.3 mg L <sup>-1</sup> DOC |                |               | in the presence of 32 mg L <sup>-1</sup> DOC |                |               |
| Al <sup>3+</sup> | <0.01                                         | <0.01          | <0.01         | <0.01                                        | <0.01          | <0.01         |
| Al-Inorg.        | 99.27                                         | 99.99          | 97.45         | 10.39                                        | 91.47          | 1.87          |
| Al-Org.          | 0.72                                          | <0.01          | 2.54          | 89.61                                        | 8.53           | 98.13         |
| Cd <sup>2+</sup> | 87.66                                         | 86.45          | 87.76         | 42.60                                        | 5.73           | 47.53         |
| Cd-Inorg.        | 11.98                                         | 12.85          | 11.96         | 5.85                                         | 0.85           | 6.50          |
| Cd-Org.          | 0.35                                          | 0.70           | 0.28          | 51.55                                        | 93.41          | 45.96         |
| Co <sup>2+</sup> | 94.55                                         | 91.47          | 94.70         | 58.46                                        | 29.66          | 61.27         |
| Co-Inorg.        | 5.18                                          | 8.13           | 5.08          | 3.24                                         | 2.66           | 3.32          |
| Co-Org.          | 0.26                                          | 0.40           | 0.21          | 38.31                                        | 67.68          | 35.41         |
| Cu <sup>2+</sup> | 59.07                                         | 3.08           | 80.46         | 0.08                                         | <0.01          | 0.28          |
| Cu-Inorg.        | 19.35                                         | 20.52          | 11.70         | 0.02                                         | <0.01          | 0.04          |
| Cu-Org.          | 21.58                                         | 76.39          | 7.84          | 99.89                                        | 99.99          | 99.68         |
| Fe <sup>3+</sup> | <0.01                                         | <0.01          | <0.01         | <0.01                                        | <0.01          | <0.01         |
| Fe-Inorg.        | 66.36                                         | 68.81          | 74.72         | <0.01                                        | <0.01          | <0.01         |
| Fe-Org.          | 33.63                                         | 31.19          | 25.28         | 99.99                                        | 99.99          | 99.99         |
| Ni <sup>2+</sup> | 93.76                                         | 91.33          | 94.05         | 23.52                                        | 17.85          | 25.89         |
| Ni-Inorg.        | 5.11                                          | 6.94           | 5.06          | 1.29                                         | 1.36           | 1.39          |
| Ni-Org.          | 1.13                                          | 1.73           | 0.90          | 75.18                                        | 80.78          | 72.70         |
| Pb <sup>2+</sup> | 63.07                                         | 10.38          | 76.74         | 0.59                                         | 0.01           | 1.69          |
| Pb-Inorg.        | 23.29                                         | 44.89          | 17.44         | 0.22                                         | 0.05           | 0.38          |
| Pb-Org.          | 13.64                                         | 44.72          | 5.81          | 99.19                                        | 99.94          | 97.92         |
| Sm <sup>3+</sup> | 2.35                                          | 0.09           | 10.81         | <0.01                                        | <0.01          | <0.01         |
| Sm-Inorg.        | 2.46                                          | 0.26           | 10.60         | <0.01                                        | <0.01          | <0.01         |
| Sm-Org.          | 95.19                                         | 99.65          | 78.58         | 99.99                                        | 99.99          | 99.99         |
| Zn <sup>2+</sup> | 92.86                                         | 63.04          | 93.56         | 30.95                                        | 2.96           | 36.16         |
| Zn-Inorg.        | 6.49                                          | 36.04          | 5.92          | 2.17                                         | 1.69           | 2.30          |
| Zn-Org.          | 0.66                                          | 0.91           | 0.51          | 66.86                                        | 95.34          | 61.53         |

72 Note, data are also shown for bulk freshwater at pH 7.0. Here, the average phycosphere  
73 pH change (i.e., a 1.3-unit increase in the light, and an assumed 0.5-unit decrease in the

74 dark) was used to calculate the speciation change in the presence of low and high  
75 concentrations of dissolved organic carbon (DOC).

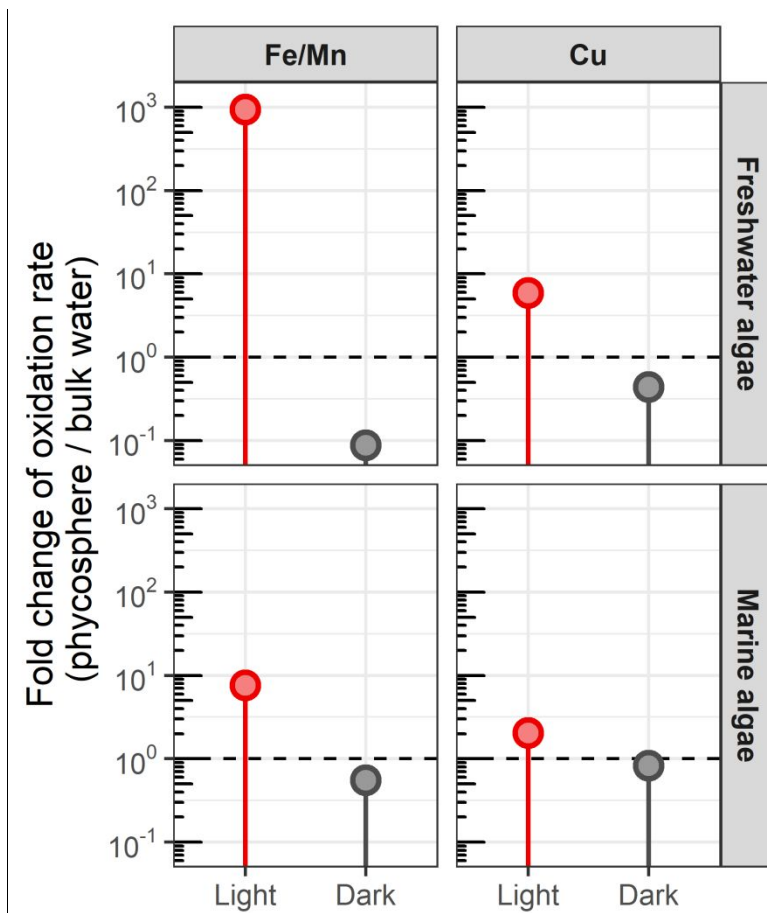

76  
77

78 **Figure S1. Fold changes in the calculated oxidation rate of Fe(II), Mn(II) and Cu(I) in the**  
 79 **phycosphere of freshwater or marine algae in the light (red) or in the dark (grey), in**  
 80 **comparison to the calculated rates in bulk solutions.** The data are shown on a log scale,  
 81 and the dashed line indicates no difference between the phycosphere and bulk water.  
 82 The details of the calculation are given in the Note S2.

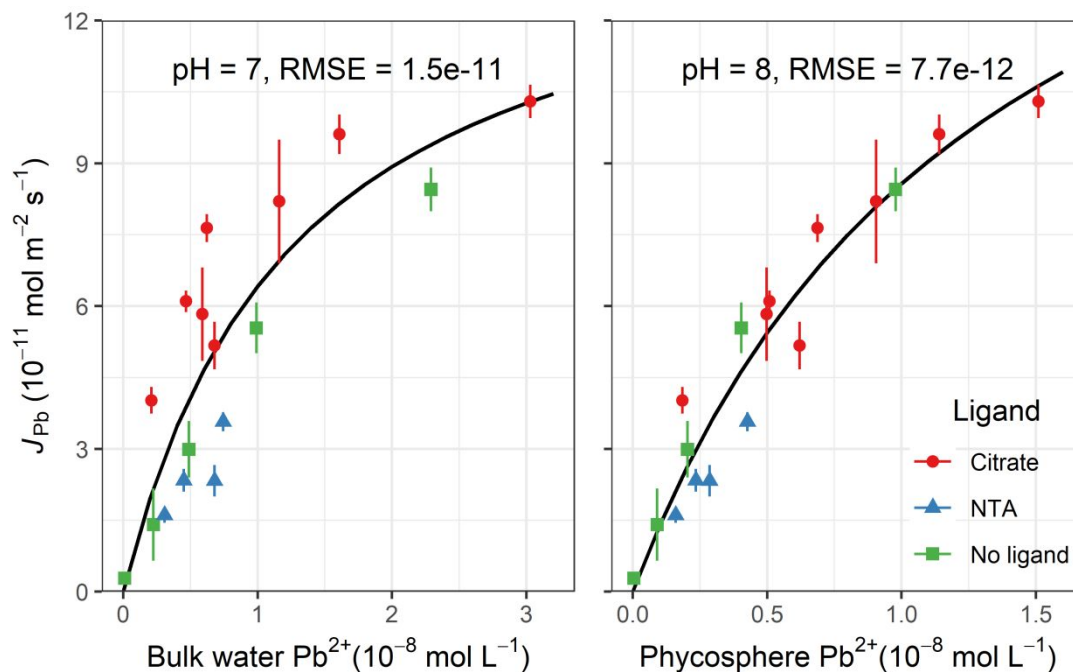

83

84

85 **Figure S2. The relationships between the calculated free  $Pb^{2+}$  concentration in the bulk**  
 86 **water (left panel) or in the phycosphere (right panel) and the measured Pb uptake rate**  
 87 **( $J_{Pb}$ ) by the freshwater alga *Chlamydomonas reinhardtii* CPCC11 under constant light**  
 88 **( $100 \mu\text{mol photons m}^{-2} \text{ s}^{-1}$ ). The data are replotted.<sup>17</sup>**

89

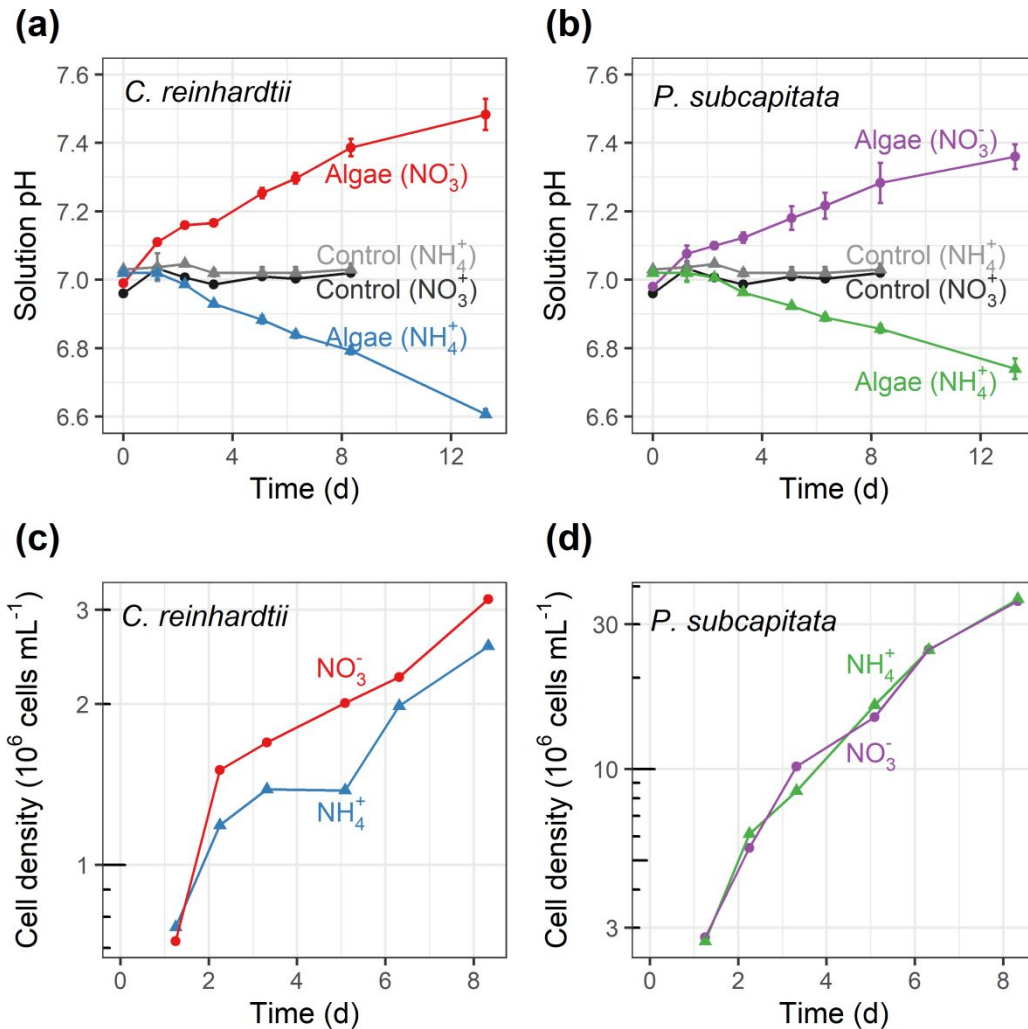

90  
 91 **Figure S3. Bulk solution pH increase/decrease in the exposure solution, by nitrate  $\text{NO}_3^-$**   
 92 **or ammonium  $\text{NH}_4^+$ -fed algae *Chlamydomonas reinhardtii* CC1690 (a) and**  
 93 ***Pseudokirchneriella subcapitata* CPCC37 (b). The growth of the two algae was**  
 94 **simultaneously monitored (c & d). The dots are the means of three replicates, and the**  
 95 **error bars representing standard deviation are very small. The growth medium MHSM-1**  
 96 **was buffered with 10 mM MOPS with either  $\text{NO}_3^-$  or  $\text{NH}_4^+$  as the only N source; more**  
 97 **details can be found in our previous study.<sup>18</sup> The present data, except for the result of**  
 98 **the  $\text{NO}_3^-$ -fed algae *C. reinhardtii* CC1690 in panel (a)<sup>18</sup>, are not shown in our early**  
 99 **papers.**  
 100

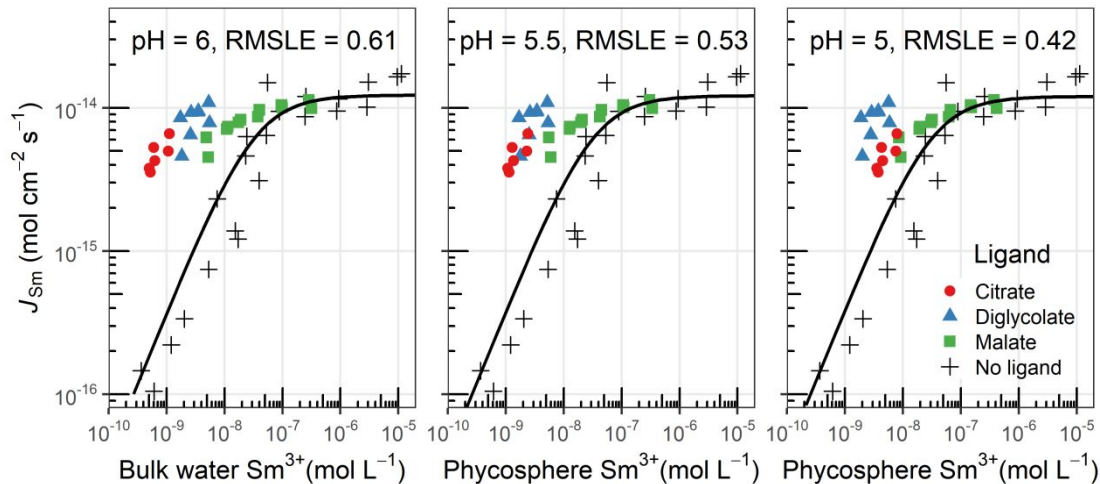

101  
 102  
 103  
 104  
 105  
 106  
 107  
 108  
 109  
 110  
 111  
 112

**Figure S4. The relationships between the measured Sm uptake rate ( $J_{Sm}$ ) by the freshwater alga *C. reinhardtii* CPCC11 and the calculated free  $Sm^{3+}$  concentration in the bulk water and in the phycosphere. The bulk medium pH<sup>19</sup> was 6, and the phycosphere  $Sm^{3+}$  concentration was calculated by assuming a phycosphere pH 5 or 5.5. Here, the phycosphere pH was assumed to be lower than the bulk water, because the uptake test was carried out under a low light intensity ( $< 20 \mu\text{mol photons m}^{-2} \text{s}^{-1}$ ) and the algae were cultured with  $NH_4^+$  as the nitrogen source. The low light and the supply of  $NH_4^+$  would likely result in an overall lower phycosphere pH than that in the bulk water (see Figure S5 for an example).**

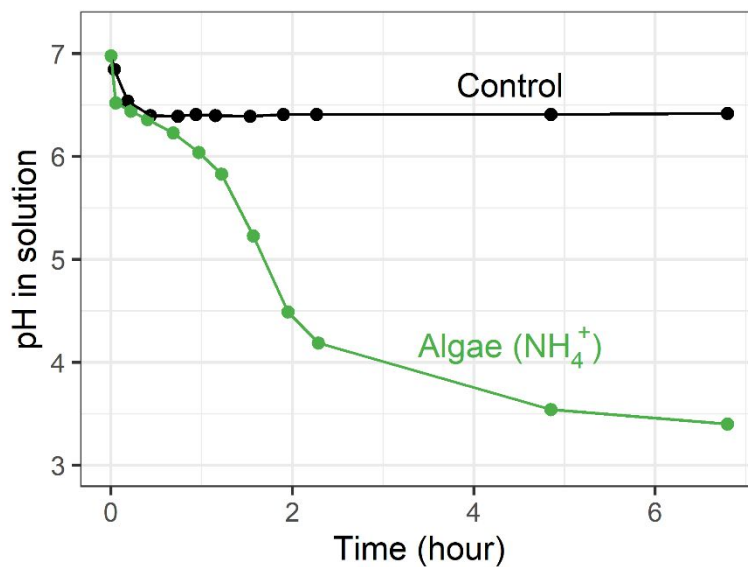

113

114

115 **Figure S5. A significant pH decrease of the exposure solution by ammonium NH<sub>4</sub><sup>+</sup>-fed**

116 **algae *Chlamydomonas reinhardtii* CPC11 at 2 × 10<sup>7</sup> cells mL<sup>-1</sup>. The experimental details**

117 can be found in our previous studies.<sup>17, 18</sup> The present data are not shown in those

118 papers.

119

120 **Note S1. Potential influences of several physical/chemical/biological factors, other**  
121 **than pH and O<sub>2</sub>, on metal behaviour in the phycosphere.**

122 In addition to pH changes, redox dynamics in the phycosphere might differ from those in  
123 the bulk water. For example, phytoplankton release various reactive oxygen species  
124 (ROS) such as H<sub>2</sub>O<sub>2</sub> and superoxide into the extracellular environment<sup>20, 21</sup>. Such solutes  
125 have slower diffusive rates ( $0.6-1.4 \times 10^{-9} \text{ m}^2 \text{ s}^{-1}$  for H<sub>2</sub>O<sub>2</sub>)<sup>22</sup> than OH<sup>-</sup>/H<sup>+</sup> ( $5.3-9.3 \times 10^{-9}$   
126  $\text{m}^2 \text{ s}^{-1}$ ), and they could hence be locally enriched. The ROS-enriched micro-environment  
127 would facilitate redox transformation of redox-sensitive metals (e.g., Fe, Cu, and Mn)  
128 and ligands (e.g., thiol-containing ligands) before metals are taken up.<sup>23, 24</sup> At present,  
129 the level and dynamic of ROS in the phycosphere remain unknown, let alone their  
130 potential influence on the local metal speciation.

131

132 Nutritional status of algae might alter chemical conditions in the phycosphere as well.  
133 For example, Milligan et al.<sup>3</sup> observed that both Fe and carbon availability influenced the  
134 phycosphere pH of the marine diatom *Thalassiosira weissflogii*; the enhancement in  
135 phycosphere pH of Fe-replete cells was 0.3-unit higher than for Fe-limited cells.  
136 Moreover, the phycosphere pH change in high pCO<sub>2</sub> treatments was not as significant as  
137 in low pCO<sub>2</sub> treatments.<sup>3</sup>

138

139 Nitrogen sources for algae might be another factor in influencing both phycosphere pH  
140 and ROS levels. Lavoie et al.<sup>25</sup> modelled the effect of different N sources on the  
141 phycosphere pH of freshwater phytoplankton, and their results suggested that  
142 NO<sub>3</sub><sup>-</sup>-grown algae would have a higher phycosphere pH than NH<sub>4</sub><sup>+</sup>-grown cells. On the  
143 other hand, studies with marine algae found that extracellular production of ROS was  
144 associated with nitrogen nutrition; nitrate could stimulate more extracellular ROS than  
145 ammonium in some algae species.<sup>26</sup>

146

147 Extracellular polymeric substances (EPS) secreted by certain phytoplankton species such



148 as *Phaeocystis*<sup>27</sup> might alter the chemical behaviour of metals in the phycosphere. For  
149 example, the residence time of metals would be longer in the phycosphere of algae  
150 having an abundance of EPS than for those without EPS, since diffusion coefficients (D)  
151 of metal ions and complexes are lower in solutions of higher viscosity,  $\eta$ , such as in the  
152 phycosphere of algae that produce EPS (i.e., due to the inverse relationship between D  
153 and  $\eta$  in the Stokes-Einstein equation).

154

155 The local chemistry in the phycosphere might also be influenced by the microbial  
156 community living in this micro-environment. In nature, a diversity of smaller  
157 microorganisms such as bacteria and viruses frequently cluster near, or attach to,  
158 phytoplankton.<sup>28, 29</sup> Thus, the metabolism of these microbes might alter phycosphere pH  
159 and redox potential (e.g., CO<sub>2</sub> release and O<sub>2</sub> consumption during respiration), and  
160 extracellular release of ROS from these bacteria<sup>21</sup> might influence chemical reactions  
161 between metals and ligands. However, the potential influence of the microbes on local  
162 metal speciation has been little examined.

163

164 Other than these biological factors, water turbulence can increase interfacial mixing of  
165 nutrients and metabolites to and from an organism (> 100  $\mu\text{m}$ ) between bulk waters and  
166 the biota. However, the effect from turbulence on the phycosphere conditions for  
167 micro-organisms of < 100  $\mu\text{m}$  in diameter would be weak, because modelling work has  
168 suggested that even high levels of turbulence (e.g., at a dissipation rate  $10^{-6} \text{ W kg}^{-1}$ )  
169 produce a tiny increase (around 2%) of the flux in the tiny interfacial layer.<sup>30</sup>

170

171 Finally, total metal concentrations as well as competing metal interactions might not be  
172 the same as those in the bulk water. For example, a higher pH and [O<sub>2</sub>] in the  
173 phycosphere could result in local precipitation of Fe and Mn<sup>9, 31</sup> and hence alter source  
174 and bioavailability of the metals to algal cells. With respect to metal-metal interactions,  
175 even if there was a simultaneous enhancement of free metal ions (e.g., Zn<sup>2+</sup> and Cd<sup>2+</sup>) in  
176 the phycosphere, this would not necessarily result in an increase in uptake of both

177 metals since they might compete with each other for the same membrane transporter.<sup>32</sup>  
178

179 **Note S2. Calculation of the differences in oxidation rates of Fe(II), Cu(I) and Mn(II)**  
180 **between the phycosphere and bulk water.**

181 Fe oxidation kinetics in both freshwater and marine waters follow the rate law:<sup>33, 34</sup>

182 
$$\text{Fe(II) oxidation rate} = \frac{-d[\text{Fe(II)}]}{dt} = k_{Fe}[\text{Fe(II)}][\text{O}_2][\text{OH}^-]^2$$

183

184 Thus, the fold change in the Fe(II) oxidation rate can be calculated by the following  
185 equation, and it can be calculated based upon the numbers in Table S5:

186 
$$\frac{\text{Fe(II) oxidation rate}_{\text{phycosphere}}}{\text{Fe(II) oxidation rate}_{\text{bulk water}}} = \frac{[\text{O}_2][\text{OH}^-]^2_{\text{phycosphere}}}{[\text{O}_2][\text{OH}^-]^2_{\text{bulk water}}}$$

187

188 Similarly, Mn(II) oxidation kinetics in seawater follow the rate law shown below<sup>35</sup> and it  
189 can be calculated based upon the numbers in the Table S5:

190 
$$\text{Mn(II) oxidation rate} = \frac{-d[\text{Mn(II)}]}{dt} = k_{Mn}[\text{Mn(II)}][\text{O}_2][\text{OH}^-]^2$$

191

192 
$$\frac{\text{Mn(II) oxidation rate}_{\text{phycosphere}}}{\text{Mn(II) oxidation rate}_{\text{bulk water}}} = \frac{[\text{O}_2][\text{OH}^-]^2_{\text{phycosphere}}}{[\text{O}_2][\text{OH}^-]^2_{\text{bulk water}}}$$

193

194 Thus, the fold change in the Mn(II) oxidation rate between phycosphere and bulk water  
195 is the same as that of Fe(II).

196

197 Cu oxidation kinetics in seawater follow the rate law shown below<sup>36</sup> and it can be  
198 calculated based upon the numbers in the Table S5:

199

200 
$$\text{Cu(I) oxidation rate} = \frac{-d[\text{Cu(I)}]}{dt} = k^*_{Cu}[\text{Cu(I)}][\text{O}_2]$$

201 The  $k^*_{Cu}$  (apparent oxidation rate constant,  $\text{M}^{-1} \text{s}^{-1}$ ) was calculated based on the  
202 measured Cu(I) oxidation kinetics at different pH levels.<sup>37</sup> The  $k^*_{Cu}$  values varied with  
203 solution pH. Specifically, the  $k^*_{Cu}$  values ( $\text{M}^{-1} \text{s}^{-1}$ ) used for the seawater calculation are

204 2.45 at pH 7.9, 2.58 at pH 8.0, and 3.02 at pH 8.32, while in freshwater they are 5.0 at  
205 pH 6.5, 10.0 at pH 7.0, and 22.9 at pH 8.28.

206

207 **Table S5. Values used for the calculation of relative changes in metal oxidation rates in**  
208 **the phycosphere, in comparison to bulk waters.**

|            |                     | bulk<br>water | phycosphere<br>light | dark |
|------------|---------------------|---------------|----------------------|------|
| freshwater | pH                  | 7.00          | 8.28                 | 6.50 |
|            | O <sub>2</sub> (mM) | 0.24          | 0.62                 | 0.21 |
| seawater   | pH                  | 8.00          | 8.32                 | 7.90 |
|            | O <sub>2</sub> (mM) | 0.23          | 0.40                 | 0.20 |

209 **Note S3. Estimation of the amount of Cu(I) oxidation and Cu complexation in the**  
210 **phycosphere.**

211 When the residence time of Cu(I) in the phycosphere is sufficiently long, all Cu(I) can be  
212 oxidized by oxidants such as O<sub>2</sub> before reacting with membrane-bound Cu reductases.  
213 However, since the phycosphere of micro-algae is a thin layer of micro-meter  
214 dimensions, the local residence time might be very short and hence little Cu(I) would be  
215 oxidized by O<sub>2</sub> within the phycosphere. Here, we calculated the residence time of Cu(I)  
216 and the percentage of total Cu(I) being oxidized by O<sub>2</sub> in the phycosphere of two marine  
217 diatoms *Thalassiosira pseudonana* and *Thalassiosira oceanica*.

218 To calculate the residence time of Cu(I) in the phycosphere, we follow:

$$219 \text{ phycosphere residence time} = \frac{[\text{Cu(I) concentration}] \times [\text{phycosphere volume}]}{[\text{Cu(I) uptake rate}] \times [\text{cell surface area}]}$$

220

221 For *T. pseudonana*, cell radius = 2.3 μm,<sup>38</sup> theoretical phycosphere thickness = cell radius  
222 <sup>39</sup> = 2.3 μm; for *T. oceanica*, cell radius = 3.3 μm,<sup>38</sup> theoretical phycosphere thickness =  
223 3.3 μm. The ratio between [Cu(I) concentration] in bulk seawater and [Cu(I) uptake rate]  
224 were taken from a short-term algal Cu uptake study,<sup>38</sup> assuming that

$$225 \frac{[\text{Cu(I) concentration}]}{[\text{Cu(I) uptake rate}]} = \frac{[\text{total Cu concentration}]}{[\text{total Cu uptake rate}]}$$

226 since data for algal Cu(I) uptake are rare in the literature. The calculated residence time  
227 of Cu ranged from 230 s to 3000 s in the phycosphere of the two species.

228

229 To calculate the percentage of total Cu(I) being oxidized by O<sub>2</sub> in the phycosphere,  
230 we considered:

$$231 \text{ Oxidized Cu(I)}_t \% = 100\% - e^{-\frac{K_{\text{Cu}}}{t}} \times 100\%$$

232  $t$  = phycosphere residence time, and  $K_{\text{Cu}} = k^*_{\text{Cu}} \times [\text{phycosphere O}_2]$ . Specifically,

233  $k^*_{\text{Cu}} = 3 \text{ M}^{-1} \text{ s}^{-1}$  (at pH 8.3)<sup>37</sup> and  $[\text{phycosphere O}_2] = 0.4 \text{ mM}$  (Table S5). The

234 percentage of total Cu(I) being oxidized by O<sub>2</sub> in the phycosphere of two marine diatoms

235 ranged from 24% to 98% (Table S6).

236

237 **Table S6. Calculation of Cu residence time and percentage of total Cu(I) being**  
238 **oxidized by O<sub>2</sub> in the phycosphere.**

| Seawater Cu<br>(mol L <sup>-1</sup> ) | Cu uptake rate<br>(mol cm <sup>-2</sup> s <sup>-1</sup> ) |                         | Phycosphere residence<br>time (s) |                      | Phycosphere oxidized<br>Cu (%) |                      |
|---------------------------------------|-----------------------------------------------------------|-------------------------|-----------------------------------|----------------------|--------------------------------|----------------------|
|                                       | <i>T. oceanica</i>                                        | <i>T. pseudonana</i>    | <i>T. oceanica</i>                | <i>T. pseudonana</i> | <i>T. oceanica</i>             | <i>T. pseudonana</i> |
| 2.0 × 10 <sup>-9</sup>                | 5.6 × 10 <sup>-18</sup>                                   | 4.6 × 10 <sup>-18</sup> | 273                               | 232                  | 28                             | 24                   |
| 3.0 × 10 <sup>-8</sup>                | 6.2 × 10 <sup>-17</sup>                                   | 5.5 × 10 <sup>-17</sup> | 366                               | 294                  | 36                             | 30                   |
| 6.0 × 10 <sup>-8</sup>                | 1.0 × 10 <sup>-16</sup>                                   | 9.9 × 10 <sup>-17</sup> | 442                               | 326                  | 41                             | 32                   |
| 1.2 × 10 <sup>-7</sup>                | 2.6 × 10 <sup>-16</sup>                                   | 9.5 × 10 <sup>-17</sup> | 348                               | 680                  | 34                             | 56                   |
| 2.4 × 10 <sup>-7</sup>                | 1.8 × 10 <sup>-16</sup>                                   | 2.2 × 10 <sup>-16</sup> | 1039                              | 591                  | 71                             | 51                   |
| 5.0 × 10 <sup>-7</sup>                | 2.6 × 10 <sup>-16</sup>                                   | 2.5 × 10 <sup>-16</sup> | 1455                              | 1086                 | 83                             | 73                   |
| 1.0 × 10 <sup>-6</sup>                | 4.2 × 10 <sup>-16</sup>                                   | 2.9 × 10 <sup>-16</sup> | 1806                              | 1872                 | 89                             | 89                   |
| 2.0 × 10 <sup>-6</sup>                | 4.8 × 10 <sup>-16</sup>                                   | 4.0 × 10 <sup>-16</sup> | 3146                              | 2716                 | 98                             | 96                   |

239 Note, the Cu uptake data were taken from the literature.<sup>38</sup>

240

241 Note, the calculated residence time of Cu in the phycosphere above is much longer than  
242 the time required for the metal diffusion from the bulk water to the cell surface in the  
243 diffusive boundary layer. Specifically, the diffusive boundary layer (i.e., a concentration  
244 gradient of Cu) would form when the algal metal uptake is very rapid but the ambient  
245 Cu concentration is relatively low.

246 To calculate the diffusion time, we can follow

247 ([https://www.physiologyweb.com/calculators/diffusion\\_time\\_calculator](https://www.physiologyweb.com/calculators/diffusion_time_calculator)):

248 
$$Diffusion\ time \approx \frac{thickness\ of\ diffusive\ boundary\ layer^2}{2 \times diffusion\ coefficient}$$

249 Here, the thickness of diffusive boundary layer was assumed comparable to the cell  
250 radius (i.e., around 2 to 3 μm for the two diatoms), and the diffusion coefficient of Cu  
251 ion and its complexes at the order of 10<sup>-6</sup> cm<sup>2</sup> s<sup>-1</sup>.<sup>40</sup> Thus, the diffusion time of Cu ions in  
252 the phycosphere was around 8 ms.

253

254 Similarly, we calculated whether Cu complexation by DOC is fast enough to allow Cu

255 speciation to reach equilibrium in the phycosphere. Specially, we follow:

256 
$$\frac{[Cu]_t}{[Cu]_0} \% = 100\% - e^{-\frac{K_{Cu-DOC}}{t}} \times 100\%$$

257  $t$  = phycosphere residence time,  $[Cu]_0$  = the initial Cu concentration, and  $K_{Cu-DOC}$  =

258  $k_{Cu-DOC} \times [\text{phycosphere DOC}]$ . Specifically,  $k_{Cu-DOC} = 6 \times 10^3 \text{ M}^{-1} \text{ s}^{-1}$  and

259  $[\text{phycosphere DOC}] = 80 \text{ } \mu\text{M}$  (around  $1 \text{ mg L}^{-1}$ ).<sup>41</sup> The percentage of Cu complexation in

260 the phycosphere of the two algae was 100%.

261

262 **Note S4. Definition of Root Mean Square Logarithmic Error (RMSLE).**

263 Root mean square error (RMSE) measures the difference between model fittings and  
264 observed values and is a measure of goodness of model fitting. In the Figures 3 and S4,  
265 where both the metal ion concentrations and the uptake rates spanned several orders  
266 of magnitude, the logarithmic version of RMSE, i.e., RMSLE, was thus used instead to  
267 achieve a more balanced measure of model performance.

268

269 
$$\text{RMSLE} = \sqrt{\frac{1}{n} \sum_{i=1}^n (\log y_i - \log \hat{y}_i)^2}$$

270 where  $y_i$  is the  $i^{\text{th}}$  observed value;  $\hat{y}_i$  is the  $i^{\text{th}}$  value predicted from the fitting;  $n$  is the  
271 number of data points.

272

273 
$$\text{RMSE} = \sqrt{\frac{1}{n} \sum_{i=1}^n (y_i - \hat{y}_i)^2}$$

274 Note, the RMSE was used to assess the goodness of fit between algal Pb uptake and  $\text{Pb}^{2+}$   
275 concentration (i.e., Figure S2), since the uptake test was carried out in a narrow range of  
276 ambient  $\text{Pb}^{2+}$  concentrations.



277 **References**

- 278 1. De Beer, D.; Larkum, A. W. D., Photosynthesis and calcification in the calcifying  
279 algae *Halimeda discoidea* studied with microsensors. *Plant, Cell Environ.* **2001**, *24*, (11),  
280 1209-1217.
- 281 2. Chrachri, A.; Hopkinson, B. M.; Flynn, K.; Brownlee, C.; Wheeler, G. L., Dynamic  
282 changes in carbonate chemistry in the microenvironment around single marine  
283 phytoplankton cells. *Nat. Commun.* **2018**, *9*, (1), 74.
- 284 3. Milligan, A. J.; Mioni, C. E.; Morel, F. M. M., Response of cell surface pH to  $p\text{CO}_2$  and  
285 iron limitation in the marine diatom *Thalassiosira weissflogii*. *Mar. Chem.* **2009**, *114*,  
286 (1-2), 31-36.
- 287 4. Zhang, Y.; Takahashi, Y.; Hong, S. P.; Liu, F.; Bednarska, J.; Goff, P. S.; Novak, P.;  
288 Shevchuk, A.; Gopal, S.; Barozzi, I.; Magnani, L.; Sakai, H.; Suguru, Y.; Fujii, T.; Erofeev, A.;  
289 Gorelkin, P.; Majouga, A.; Weiss, D. J.; Edwards, C.; Ivanov, A. P.; Klenerman, D.;  
290 Sviderskaya, E. V.; Edel, J. B.; Korchev, Y., High-resolution label-free 3D mapping of  
291 extracellular pH of single living cells. *Nat. Commun.* **2019**, *10*, (1), 5610.
- 292 5. Kühn, S. F.; Raven, J. A., Photosynthetic oscillation in individual cells of the marine  
293 diatom *Coscinodiscus wailesii* (Bacillariophyceae) revealed by microsensor  
294 measurements. *Photosynth. Res.* **2008**, *95*, (1), 37-44.
- 295 6. Eichner, M. J.; Klawonn, I.; Wilson, S. T.; Littmann, S.; Whitehouse, M. J.; Church, M.  
296 J.; Kuypers, M. M. M.; Karl, D. M.; Ploug, H., Chemical microenvironments and single-cell  
297 carbon and nitrogen uptake in field-collected colonies of *Trichodesmium* under different  
298  $p\text{CO}_2$ . *ISME J.* **2017**, *11*, 1305.
- 299 7. Kühn, S. F.; Köhler-Rink, S., pH effect on the susceptibility to parasitoid infection in  
300 the marine diatom *Coscinodiscus* spp. (Bacillariophyceae). *Mar. Biol.* **2008**, *154*, (1),  
301 109-116.
- 302 8. Ploug, H.; Stolte, W.; Epping, E. H. G.; Jørgensen, B. B., Diffusive boundary layers,  
303 photosynthesis, and respiration of the colony-forming plankton algae, *Phaeocystis* sp.  
304 *Limnol. Oceanogr.* **1999**, *44*, (8), 1949-1958.
- 305 9. Richardson, L. L.; Stolzenbach, K. D., Phytoplankton cell size and the development  
306 of microenvironments. *FEMS Microbiol. Ecol.* **1995**, *16*, (3), 185-191.
- 307 10. Richardson, L. L.; Aguilar, C.; Neelson, K. H., Manganese oxidation in pH and  $\text{O}_2$   
308 microenvironments produced by phytoplankton. *Limnol. Oceanogr.* **1988**, *33*, (3),  
309 352-363.
- 310 11. Lofts, S.; Tipping, E., Assessing WHAM/Model VII against field measurements of  
311 free metal ion concentrations: model performance and the role of uncertainty in  
312 parameters and inputs. *Environ. Chem.* **2011**, *8*, (5), 501-516.
- 313 12. Stockdale, A.; Tipping, E.; Hamilton-Taylor, J.; Lofts, S., Trace metals in the open  
314 oceans: speciation modelling based on humic-type ligands. *Environ. Chem.* **2011**, *8*, (3),  
315 304-319.
- 316 13. Stockdale, A.; Tipping, E.; Lofts, S., Dissolved trace metal speciation in estuarine and  
317 coastal waters: Comparison of WHAM/Model VII predictions with analytical results.  
318 *Environ. Toxicol. Chem.* **2015**, *34*, (1), 53-63.

- 319 14. Tipping, E.; Lofts, S.; Stockdale, A., Metal speciation from stream to open ocean:  
320 modelling v. measurement. *Environ. Chem.* **2016**, *13*, (3), 464-477.
- 321 15. De Carlo, E. H.; Green, W. J., Rare earth elements in the water column of Lake  
322 Vanda, McMurdo Dry Valleys, Antarctica. *Geochim. Cosmochim. Acta* **2002**, *66*, (8),  
323 1323-1333.
- 324 16. Kulaksız, S.; Bau, M., Contrasting behaviour of anthropogenic gadolinium and  
325 natural rare earth elements in estuaries and the gadolinium input into the North Sea.  
326 *Earth. Planet. Sci. Lett.* **2007**, *260*, (1), 361-371.
- 327 17. Sánchez-Marín, P.; Liu, F.; Chen, Z.; Fortin, C.; Campbell, P. G. C., Microalgal-driven  
328 pH changes in the boundary layer lead to apparent increases in Pb internalization by a  
329 unicellular alga in the presence of citrate. *Limnol. Oceanogr.* **2018**, *63*, (3), 1328-1339.
- 330 18. Liu, F.; Fortin, C.; Campbell, P. G. C., Chemical conditions in the boundary layer  
331 surrounding phytoplankton cells modify cadmium bioavailability. *Environ. Sci. Technol.*  
332 **2018**, *52*, (14), 7988-7995.
- 333 19. Tan, Q.-G.; Yang, G.; Wilkinson, K. J., Biotic ligand model explains the effects of  
334 competition but not complexation for Sm biouptake by *Chlamydomonas reinhardtii*.  
335 *Chemosphere* **2017**, *168*, 426-434.
- 336 20. Schneider, R. J.; Roe, K. L.; Hansel, C. M.; Voelker, B. M., Species-level variability in  
337 extracellular production rates of reactive oxygen species by diatoms. *Front. Chem.* **2016**,  
338 *4*, (5).
- 339 21. Diaz, J. M.; Hansel, C. M.; Voelker, B. M.; Mendes, C. M.; Andeer, P. F.; Zhang, T.,  
340 Widespread production of extracellular superoxide by heterotrophic bacteria. *Science*  
341 **2013**, *340*, (6137), 1223-1226.
- 342 22. Hall, S. B.; Khudaish, E. A.; Hart, A. L., Electrochemical oxidation of hydrogen  
343 peroxide at platinum electrodes. Part 1. An adsorption-controlled mechanism.  
344 *Electrochim. Acta* **1998**, *43*, (5), 579-588.
- 345 23. Rose, A. L., The influence of reactive oxygen species on local redox conditions in  
346 oxygenated natural waters. *Front. Earth Sci.* **2016**, *4*, (96).
- 347 24. Rose, A., The Influence of extracellular superoxide on iron redox chemistry and  
348 bioavailability to aquatic microorganisms. *Front. Microbiol.* **2012**, *3*, (124).
- 349 25. Lavoie, M.; Duval, J. F. L.; Raven, J. A.; Maps, F.; Béjaoui, B.; Kieber, D. J.; Vincent,  
350 W. F., Carbonate disequilibrium in the external boundary layer of freshwater  
351 chrysophytes: Implications for contaminant uptake. *Environ. Sci. Technol.* **2018**, *52*, (16),  
352 9403-9411.
- 353 26. Palenik, B. P.; Morel, F. M. M., Amino acid utilization by marine phytoplankton: a  
354 novel mechanism. *Limnol. Oceanogr.* **1990**, *35*, 260-269.
- 355 27. Janse, I.; van Rijssel, M.; Gottschal, J. C.; Lancelot, C.; Gieskes, W. W. C.,  
356 Carbohydrates in the North Sea during spring blooms of *Phaeocystis*: a specific  
357 fingerprint. *Aquat. Microb. Ecol.* **1996**, *10*, (1), 97-103.
- 358 28. Stocker, R., Marine microbes see a sea of gradients. *Science* **2012**, *338*, (6107),  
359 628-633.
- 360 29. Azam, F.; Malfatti, F., Microbial structuring of marine ecosystems. *Nat. Rev.*  
361 *Microbiol.* **2007**, *5*, (10), 782-791.

- 362 30. Lazier, J. R. N.; Mann, K. H., Turbulence and the diffusive layers around small  
363 organisms. *Deep-Sea Res. Pt. I* **1989**, *36*, (11), 1721-1733.
- 364 31. Schoemann, V.; Wollast, R.; Chou, L.; Lancelot, C., Effects of photosynthesis on the  
365 accumulation of Mn and Fe by *Phaeocystis* colonies. *Limnol. Oceanogr.* **2001**, *46*, (5),  
366 1065-1076.
- 367 32. Lavoie, M.; Campbell, P. G. C.; Fortin, C., Extending the biotic ligand model to  
368 account for positive and negative feedback interactions between cadmium and zinc in a  
369 freshwater alga. *Environ. Sci. Technol.* **2012**, *46*, 12129-12136.
- 370 33. Millero, F. J., The effect of ionic interactions on the oxidation of metals in natural  
371 waters. *Geochim. Cosmochim. Acta* **1985**, *49*, (2), 547-553.
- 372 34. Stumm, W.; Morgan, J. J., *Aquatic chemistry: chemical equilibria and rates in*  
373 *natural waters*. John Wiley & Sons: 1996; Vol. 126.
- 374 35. von Langen, P. J.; Johnson, K. S.; Coale, K. H.; Elrod, V. A., Oxidation kinetics of  
375 manganese (II) in seawater at nanomolar concentrations. *Geochim. Cosmochim. Acta*  
376 **1997**, *61*, (23), 4945-4954.
- 377 36. Moffett, J. W.; Zika, R. G., Oxidation kinetics of Cu(I) in seawater: implications for its  
378 existence in the marine environment. *Mar. Chem.* **1983**, *13*, (3), 239-251.
- 379 37. Yuan, X.; Pham, A. N.; Xing, G.; Rose, A. L.; Waite, T. D., Effects of pH, chloride, and  
380 bicarbonate on Cu(I) oxidation kinetics at circumneutral pH. *Environ. Sci. Technol.* **2012**,  
381 *46*, (3), 1527-1535.
- 382 38. Guo, J.; Annett, A. L.; Taylor, R. L.; Lapi, S.; Ruth, T. J.; Maldonado, M. T., Copper  
383 uptake kinetics of coastal and oceanic diatoms. *J. Phycol.* **2010**, *46*, (6), 1218-1228.
- 384 39. Wolf-Gladrow, D.; Riebesell, U., Diffusion and reactions in the vicinity of plankton:  
385 A refined model for inorganic carbon transport. *Mar. Chem.* **1997**, *59*, (1), 17-34.
- 386 40. Buffle, J.; Zhang, Z.; Startchev, K., Metal flux and dynamic speciation at  
387 (Bio)interfaces. part 1: Critical evaluation and compilation of physicochemical  
388 parameters for complexes with simple Ligands and Fulvic/Humic substances. *Environ.*  
389 *Sci. Technol.* **2007**, *41*, (22), 7609-7620.
- 390 41. Louis, Y.; Garnier, C.; Lenoble, V.; Mounier, S.; Cukrov, N.; Omanović, D.; Pižeta, I.,  
391 Kinetic and equilibrium studies of copper-dissolved organic matter complexation in  
392 water column of the stratified Krka River estuary (Croatia). *Mar. Chem.* **2009**, *114*, (3),  
393 110-119.
- 394
